# Supplementary material for: An increase in negative supercoiling in bacteria reveals topology-reacting gene clusters and a homeostatic response mediated by the DNA topoisomerase I gene
Source: PubMed Central journal article supplement — Nucleic Acids Res. 2016 Jul 4;44(15):7292–303. doi: 10.1093/nar/gkw602 (PMC5009749; doi:10.1093/nar/gkw602), 2016-07-04
Supplement: supp_gkw602_nar-00456-f-2016-File009.pdf [file supp_gkw602_nar-00456-f-2016-File009.pdf]

Table S1. Genes involved in the transcriptomic response of *S. pneumoniae* to treatment with 8  $\mu$ M seconeolitsine.

| spr code | Protein <sup>a</sup>                                | Gene               | Cluster | Leader/<br>leading | Relative fold variation detected by <sup>b</sup> |      |             |      |      |
|----------|-----------------------------------------------------|--------------------|---------|--------------------|--------------------------------------------------|------|-------------|------|------|
|          |                                                     |                    |         |                    | RNASeq                                           |      | Microarrays |      |      |
|          |                                                     |                    |         |                    | t5                                               | t15  | t5          | t15  | t30  |
| 0001     | Chromosome replication initiation protein           | <b><i>dnaA</i></b> | 1       | →                  |                                                  | 2.0  |             |      |      |
| 0005     | Peptidyl-tRNA hydrolase                             | <b><i>pth</i></b>  | 1       | →                  | 3.2                                              | 2.3  |             |      |      |
| 0006     | Transcription-repair coupling factor                | <b><i>mfd</i></b>  | 1       | →                  | 3.0                                              | 2.2  | 2.9         | 2.8  |      |
| 0007     | Conserved hypothetical                              |                    | 1       | →                  | 2.0                                              |      |             |      |      |
| 0008     | Hypothetical                                        |                    | 1       | →                  | 2.6                                              | 2.0  |             |      |      |
| 0009     | Conserved hypothetical                              |                    | 1       | →                  | 2.7                                              | 2.2  |             |      |      |
| 0010     | Conserved hypothetical                              |                    | 1       | →                  | 2.6                                              | 2.1  | 2.3         | 2.3  |      |
| 0012     | ATP-dependent zinc metalloprotease                  | <b><i>ftsH</i></b> | 1       | →                  | 2.0                                              |      |             |      |      |
| 0013     | Competence-specific transcription modulator         | <b><i>comX</i></b> | 1       | →                  |                                                  |      | 9.6         | 9.8  |      |
| 0014     | Transposase                                         |                    | 1       | →                  | 2.0                                              |      | 4.0         | 4.3  |      |
| 0016     | Transposase                                         |                    | 1       | →                  | 3.1                                              | 2.7  |             |      |      |
| 0017     | Degenerate transposase                              |                    | 1       | ←                  | 5.3                                              | 4.9  | 3.6         |      |      |
| 0018     | Degenerate transposase                              |                    | 1       | ←                  | 6.5                                              | 5.4  | 3.7         | 3.7  | -3.3 |
| 0019     | Degenerate transposase                              |                    | 1       | ←                  | 6.2                                              | 5.9  | 3.3         | 3.2  | -2.9 |
| 0022     | Conserved hypothetical                              |                    |         |                    |                                                  |      |             |      | -3.7 |
| 0030     | Hypothetical                                        |                    |         |                    |                                                  |      | 2.1         |      |      |
| 0031     | Hypothetical                                        |                    |         |                    |                                                  |      | 4.0         |      |      |
| 0032     | DNA polymerase I                                    | <b><i>polA</i></b> |         |                    | -4.9                                             | -2.9 | -4.0        | -3.9 |      |
| 0033     | Conserved hypothetical                              |                    |         |                    | -4.0                                             | -3.6 |             |      |      |
| 0034     | Conserved hypothetical                              |                    |         |                    | -8.9                                             | -4.6 |             |      |      |
| 0043     | Competence factor transporting ATP-binding protein  | <b><i>comA</i></b> |         |                    |                                                  |      | 8.3         | 8.2  |      |
| 0044     | Competence factor transport protein                 | <b><i>comB</i></b> |         |                    |                                                  |      | 9.5         |      |      |
| 0045     | P-ribosylaminoimidazole-succinocarboxamide synthase | <b><i>purC</i></b> |         |                    |                                                  |      | 4.5         | 4.3  |      |
| 0054     | P-ribosyl glucinamide formyltransferase             | <b><i>purK</i></b> |         |                    | -2.3                                             |      |             |      |      |
| 0055     | Hypothetical                                        |                    |         |                    | -2.5                                             |      |             |      |      |
| 0056     | Adenylosuccinate lyase                              | <b><i>purB</i></b> |         |                    | -2.5                                             |      |             |      |      |
| 0059     | Beta-galactosidase 3                                | <b><i>bgaC</i></b> |         |                    | -2.5                                             |      |             |      |      |
| 0068     | Conserved hypothetical                              |                    |         |                    | -4.4                                             | -2.8 | -3.9        | -3.9 |      |
| 0069     | Hypothetical                                        |                    |         |                    | -4.7                                             |      | -4.3        | -4.2 |      |
| 0070     | Transporter membrane-spanning protein-K+            | <b><i>trkH</i></b> |         |                    | -2.3                                             |      |             |      |      |
| 0071     | Transporter NAD+ binding protein-K+                 | <b><i>trkA</i></b> |         |                    | -2.3                                             |      | -2.7        | -2.6 |      |
| 0076     | Response regulator                                  | <b><i>rr08</i></b> |         |                    | -3.9                                             | -3.3 | -3.1        | -2.9 |      |
| 0077     | Histidine kinase                                    | <b><i>hk08</i></b> |         |                    | -3.5                                             | -2.7 |             |      |      |
| 0079     | Degenerate transposase                              |                    |         |                    |                                                  |      | 3.9         | 4.2  |      |
| 0088     | Hypothetical                                        |                    |         |                    | -2.7                                             |      |             |      |      |
| 0089     | Conserved hypothetical                              |                    |         |                    | -2.5                                             |      |             |      |      |
| 0090     | Conserved hypothetical                              |                    |         |                    | -5.4                                             | -3.9 |             | -4.2 |      |
| 0099     | ABCT membrane-spanning permease-amino acid          |                    |         |                    |                                                  |      | -2.2        | -2.1 |      |
| 0101     | ABCT solute-binding protein-amino acid              |                    |         |                    | -4.2                                             | -3.0 |             |      |      |
| 0102     | Arg-succinate synthase                              | <b><i>argG</i></b> |         |                    | -5.8                                             | -3.8 |             |      |      |

|      |                                                              |              |   |   |      |      |      |      |
|------|--------------------------------------------------------------|--------------|---|---|------|------|------|------|
| 0103 | Arg-succinate lyase                                          | <i>argH</i>  |   |   | -6.5 | -5.0 |      |      |
| 0104 | Hypothetical                                                 |              |   |   | -4.1 |      |      |      |
| 0105 | Transporter, truncation                                      |              |   |   |      |      |      | -2.1 |
| 0110 | Hypothetical                                                 |              |   |   |      |      |      | -2.1 |
| 0113 | Hypothetical                                                 |              |   |   |      |      | -2.1 | -2.1 |
| 0121 | Surface protein PspA                                         | <i>pspA</i>  |   |   | -2.4 |      |      |      |
| 0122 | tRNA (5-methylaminomethyl-2-thiouridylate)-methyltransferase | <i>mnmA</i>  |   |   | -3.6 | -4.0 |      |      |
| 0123 | Conserved hypothetical                                       |              |   |   | -2.4 | -2.7 |      |      |
| 0124 | tRNA uridine 5-carboxymethylaminomethyl modification         | <i>gidA</i>  |   |   | -2.4 | -2.9 |      |      |
| 0127 | Bacteriocin GG peptide                                       | <i>cibB</i>  |   |   | 2.1  |      |      |      |
| 0128 | Bacteriocin GG peptide                                       | <i>cibA</i>  |   |   |      |      | 36.3 | 35.6 |
| 0130 | Ribosomal protein Ala acetyltransferase                      | <i>rimI</i>  |   |   | -2.2 |      | -2.3 | -2.2 |
| 0146 | ABCT substrate-binding-amino acid                            |              |   |   | -2.5 | -2.1 | -2.3 | -2.2 |
| 0157 | Conserved hypothetical                                       |              |   |   | 2.4  | 2.3  |      |      |
| 0158 | Hypothetical                                                 |              |   |   | 4.7  | 4.7  |      | 2.0  |
| 0159 | Conserved hypothetical                                       |              |   |   | 4.4  | 3.7  | 3.1  | 3.2  |
| 0161 | Riboflavin synthase beta chain                               | <i>ribH</i>  |   |   | 5.0  | 4.8  | 2.8  | 2.7  |
| 0162 | Riboflavin biosynthesis; GTP-cyclohydrolase II.              | <i>ribA</i>  |   |   | 4.4  | 4.3  | 3.1  | 3.0  |
| 0163 | Riboflavin synthase alpha-chain                              | <i>ribC</i>  |   |   | 4.2  | 4.1  | 2.6  | 2.6  |
| 0164 | Riboflavin biosynthesis; a deaminase                         | <i>ribD</i>  |   |   | 3.7  | 3.6  | 2.0  | 2.0  |
| 0173 | Arsenate reductase                                           | <i>arsC</i>  |   |   | 2.1  |      | 2.2  | 2.2  |
| 0174 | Hypothetical                                                 |              |   |   | 3.3  | 2.4  | 2.6  | 2.5  |
| 0178 | Dihydrofolate:folylpoly-Glu synthase                         | <i>folC</i>  |   |   | 2.9  | 2.5  | 2.3  | 2.3  |
| 0179 | Hypothetical                                                 |              |   |   | 2.2  |      |      |      |
| 0180 | Cardiolipin synthase                                         | <i>cls</i>   |   |   | 2.1  |      |      |      |
| 0181 | Hypothetical                                                 | <i>orf47</i> |   |   |      |      | 3.5  | 3.4  |
| 0184 | Hypothetical                                                 |              |   |   | 2.0  |      |      |      |
| 0185 | Ribonucleoside-tri-P reductase activating protein            | <i>nrdG</i>  |   |   | 2.0  |      |      |      |
| 0186 | Hypothetical                                                 |              |   |   | 1.9  |      |      |      |
| 0218 | Conserved hypothetical                                       |              |   |   | -1.9 |      |      |      |
| 0224 | ABCT substrate-binding-iron                                  |              |   |   |      |      |      | 2.2  |
| 0236 | Conserved hypothetical                                       |              |   |   | -3.1 | -2.6 |      |      |
| 0237 | Conserved hypothetical                                       |              |   |   | -3.3 |      |      |      |
| 0244 | 6-P-beta-glucosidase                                         | <i>bglA</i>  |   |   | 1.9  | 2.2  |      |      |
| 0245 | L-Gln-D-fructose-6-P-amidotransferase                        | <i>glmS</i>  |   |   | -7.6 | -6.9 |      |      |
| 0247 | LPxTG protein. Alkaline amylopullulanase                     | <i>spuA</i>  |   |   | -7.4 | -5.4 |      |      |
| 0251 | DNA polymerase III, alpha subunit                            | <i>polC</i>  |   |   | 1.9  |      |      |      |
| 0254 | Aminopeptidase                                               | <i>pepS</i>  | 8 | → |      |      | -2.0 | -2.0 |
| 0257 | Hypothetical                                                 |              | 8 | → | -3.0 |      |      |      |
| 0258 | Aminopeptidase C                                             | <i>pepC</i>  | 8 | → | -4.5 | -4.3 |      |      |
| 0259 | PTS mannose-specific EIID                                    | <i>manN</i>  | 8 | ← | -3.0 |      |      |      |
| 0260 | PTS mannose-specific EIIC                                    | <i>manM</i>  | 8 | ← | -3.0 |      |      |      |
| 0261 | PTS mannose-specific EIIB                                    | <i>manL</i>  | 8 | ← | -2.7 |      |      |      |
| 0262 | Alcohol DH                                                   | <i>adhP</i>  | 8 | ← | -8.3 | -3.1 |      |      |
| 0263 | Conserved hypothetical                                       |              | 8 | ← | -4.7 | -2.5 |      |      |
| 0266 | Dihydropteroate synthase                                     | <i>sulA</i>  | 8 | → | -2.0 |      |      |      |
| 0270 | Hypothetical                                                 |              |   |   | -7.1 | -4.5 |      |      |



|      |                                               |                     |            |            |            |            |
|------|-----------------------------------------------|---------------------|------------|------------|------------|------------|
| 0426 | Trk transporter membrane-spanning protein-K+  | <b><i>trkH</i></b>  | -5.4       | -2.9       |            |            |
| 0427 | Trk NAD <sup>+</sup> binding protein-K+       | <b><i>trkA</i></b>  | -5.1       | -3.1       |            |            |
| 0428 | Conserved hypothetical                        |                     | -2.8       |            | -2.6       |            |
| 0429 | Conserved hypothetical                        |                     | -2.7       |            |            |            |
| 0434 | Conserved hypothetical                        |                     | <b>1.9</b> |            |            |            |
| 0436 | Hypothetical                                  |                     | <b>1.9</b> |            |            |            |
| 0437 | RNA polymerase delta subunit                  | <b><i>rpoE</i></b>  | <b>2.6</b> | <b>2.0</b> |            |            |
| 0439 | Conserved hypothetical                        |                     | -2.3       |            |            |            |
| 0445 | Type I restriction enzyme                     | <b><i>hsdS</i></b>  | <b>2.2</b> | <b>2.6</b> | <b>2.0</b> |            |
| 0446 | Type I restriction enzyme specificity protein | <b><i>hsdS</i></b>  | <b>2.3</b> | <b>2.6</b> |            |            |
| 0459 | ABCT ATP-binding protein                      |                     |            |            |            | <b>3.6</b> |
| 0460 | ABCT membrane-spanning permease               |                     | -1.9       |            |            | <b>4.4</b> |
| 0462 | Regulatory protein                            | <b><i>spiR1</i></b> | -2.4       |            |            |            |
| 0465 | Peptide pheromone, bacteriocin-like peptide   | <b><i>spiP</i></b>  |            |            |            | <b>2.7</b> |
| 0470 | Bacteriocine-like                             | <b><i>pncW</i></b>  |            |            | <b>2.1</b> | <b>3.3</b> |
| 0471 | CAAX protease                                 | <b><i>pncO</i></b>  |            |            |            | <b>3.0</b> |
| 0472 | Immunity protein                              | <b><i>pncQ</i></b>  |            |            |            | <b>2.8</b> |
| 0473 | CAAX protease                                 | <b><i>pncP</i></b>  |            | <b>2.2</b> |            |            |
| 0474 | ABCT ATP binding protein                      |                     |            | <b>2.5</b> |            | <b>2.9</b> |
| 0477 | Conserved hypothetical                        |                     | <b>1.9</b> |            |            |            |
| 0479 | Conserved hypothetical                        |                     | <b>1.8</b> |            |            |            |
| 0480 | Conserved hypothetical                        |                     | <b>2.1</b> |            |            |            |
| 0483 | Conserved hypothetical                        |                     | <b>7.6</b> |            |            |            |
| 0484 | Hypothetical                                  |                     |            |            | <b>2.3</b> |            |
| 0485 | Hypothetical                                  |                     |            |            | -2.0       |            |
| 0486 | Conserved hypothetical                        |                     | -2.2       | -2.2       |            |            |
| 0489 | Hypothetical                                  |                     | -2.1       |            |            |            |
| 0490 | Conserved hypothetical                        |                     | -2.3       |            |            |            |
| 0491 | Hypothetical                                  |                     | -2.2       | -2.0       |            |            |
| 0492 | Valyl-tRNA synthetase                         | <b><i>valS</i></b>  | -2.2       | -2.1       |            |            |
| 0497 | Degenerate transposase                        |                     |            |            | <b>3.3</b> | <b>3.1</b> |
| 0498 | Degenerate transposase                        |                     |            |            | <b>4.5</b> | <b>4.3</b> |
| 0499 | Hypothetical                                  |                     | -3.9       | -3.3       | -2.0       |            |
| 0502 | Hypothetical                                  |                     | -4.0       |            |            |            |
| 0503 | Hypothetical                                  |                     | -3.2       |            | -2.6       | -2.8       |
| 0507 | Phe-tRNA synthase alpha chain                 | <b><i>pheS</i></b>  | -2.8       | -1.9       |            |            |
| 0508 | Conserved hypothetical                        |                     | -2.4       |            |            |            |
| 0509 | Phe-tRNA synthase beta chain                  | <b><i>pheT</i></b>  | -2.8       | -2.0       |            |            |
| 0510 | Hypothetical                                  |                     | -5.5       | -3.5       | -4.3       |            |
| 0511 | Degenerate transposase                        |                     |            |            |            | -2.0       |
| 0514 | Tetrahydropteroyltri-Glu methyltransferase    | <b><i>metE</i></b>  | -4.0       | -3.2       |            |            |
| 0515 | 5,10-methylenetetrahydrofolate reductase      | <b><i>metF</i></b>  | -3.7       |            |            |            |
| 0524 | ABCT membrane-spanning permease-peptide       | <b><i>vex1</i></b>  | <b>2.6</b> | <b>2.3</b> |            |            |
| 0526 | ABCT membrane-spanning permease-peptide       | <b><i>vex3</i></b>  | <b>2.6</b> | <b>2.3</b> |            |            |
| 0530 | Fructose-bi-P aldolase                        | <b><i>fba</i></b>   | <b>2.1</b> |            |            |            |
| 0531 | Hypothetical                                  |                     | <b>4.2</b> | <b>3.0</b> | <b>3.6</b> | <b>3.6</b> |
| 0532 | ABCT membrane-spanning permease-Gln           | <b><i>glnP</i></b>  | <b>4.0</b> | <b>3.3</b> |            |            |

|      |                                               |             |   |   |      |      |      |      |     |
|------|-----------------------------------------------|-------------|---|---|------|------|------|------|-----|
| 0533 | ABCT membrane-spanning permease-Gln           | <i>glnP</i> |   |   | 4.4  | 3.4  |      |      |     |
| 0536 | ABCT ATP-binding protein-Gln                  | <i>glnH</i> |   |   | 3.1  |      |      |      |     |
| 0537 | Single-stranded DNA-specific exonuclease      | <i>recJ</i> |   |   |      | -1.9 |      |      |     |
| 0539 | Tributylin esterase                           | <i>estA</i> |   |   | 3.0  | 2.9  |      |      |     |
| 0542 | Hypothetical                                  |             |   |   | 2.3  | 2.0  | 2.5  | 2.5  |     |
| 0557 | ABCT ATP-binding protein                      |             |   |   | -2.8 | -3.0 |      |      |     |
| 0558 | Conserved hypothetical                        |             |   |   | -2.7 | -2.9 |      |      |     |
| 0559 | Conserved hypothetical                        |             |   |   | -2.8 | -2.8 |      |      |     |
| 0560 | Hypothetical                                  |             |   |   | -2.2 |      |      |      |     |
| 0562 | PTS sugar-specific EII component              |             |   |   | -2.8 |      |      |      |     |
| 0563 | Hypothetical                                  |             |   |   | -2.4 |      |      |      |     |
| 0568 | Hypothetical                                  |             |   |   | -2.6 |      |      |      |     |
| 0578 | Response regulator                            | <i>rr09</i> |   |   | -2.5 | -2.2 |      |      |     |
| 0579 | Histidine kinase                              | <i>hk09</i> |   |   | -2.4 |      |      |      |     |
| 0585 | Thymidylate synthase                          | <i>thyA</i> |   |   | -2.8 | -2.6 |      |      |     |
| 0599 | Hypothetical                                  |             |   |   |      |      | -2.3 | -2.4 |     |
| 0613 | Orotidine-5-decarboxylase                     | <i>pyrF</i> |   |   | -3.1 | -2.3 |      |      |     |
| 0614 | Orotate P-ribosyltransferase                  | <i>pyrE</i> |   |   |      |      |      | -2.4 |     |
| 0620 | ABCT substrate-binding protein                |             |   |   |      |      |      | 2.5  |     |
| 0621 | ABCT substrate-binding protein                |             |   |   |      |      |      | 2.4  |     |
| 0628 | Conserved hypothetical                        |             | 3 | → | 3.9  |      |      |      |     |
| 0629 | Hydroxyethylthiazole kinase                   | <i>thiM</i> | 3 | → | 4.2  |      |      |      |     |
| 0630 | Thiamin-P pyrophosphorylase                   | <i>thiE</i> | 3 | → | 4.8  |      |      |      |     |
| 0631 | Conserved hypothetical                        |             | 3 | → | 6.6  |      | 2.5  | 2.6  |     |
| 0632 | ABCT ATP-binding protein                      |             | 3 | → | 7.4  | 3.6  | 4.8  | 4.8  |     |
| 0633 | Conserved hypothetical                        |             | 3 | → | 9.4  | 4.9  | 6.6  | 6.3  |     |
| 0634 | Transcriptional regulator                     | <i>tenA</i> | 3 | → | 13.3 | 5.9  | 6.1  | 6.0  | 2.9 |
| 0635 | Hypothetical                                  |             | 3 | → | 15.1 | 6.9  | 2.6  | 2.7  |     |
| 0636 | Hydroxyethylthiazole kinase                   | <i>thiM</i> | 3 | → | 9.3  | 4.2  | 4.4  | 4.2  |     |
| 0637 | Thiamine-P pyrophosphorylase                  | <i>thiE</i> | 3 | → | 12.8 | 5.1  | 3.9  | 4.0  |     |
| 0639 | COPAB ATPases metal repressor                 | <i>copY</i> | 3 | → |      | 3.1  |      |      |     |
| 0645 | Hypothetical                                  |             |   |   |      |      | 2.2  | 2.2  |     |
| 0646 | P-beta-gluco or galactosidase                 | <i>bgl</i>  |   |   | 6.9  |      |      |      |     |
| 0652 | Conserved hypothetical                        |             |   |   |      | -2.1 |      |      |     |
| 0653 | Conserved hypothetical                        |             |   |   | -2.9 |      |      |      |     |
| 0655 | Uracil P-ribosyltransferase                   | <i>upp</i>  |   |   | 2.5  |      |      |      |     |
| 0665 | Peptide chain release factor 2                | <i>prfB</i> |   |   | 1.9  |      |      |      |     |
| 0666 | ABCT ATP-binding protein                      | <i>ftsE</i> |   |   | 2.1  |      |      |      |     |
| 0667 | Cell division                                 | <i>ftsX</i> |   |   | 2.3  |      |      |      |     |
| 0669 | Hypothetical                                  |             |   |   | 2.7  |      |      |      |     |
| 0690 | Conserved hypothetical                        |             |   |   |      |      | 2.5  | 2.5  |     |
| 0692 | Glutathione oxidoreductase                    | <i>gor</i>  |   |   | -2.4 | -2.7 |      |      |     |
| 0697 | Conserved hypothetical                        |             |   |   | 2.9  | 2.9  |      |      |     |
| 0698 | Conserved hypothetical                        |             |   |   | 3.5  | 3.1  | 2.1  | 2.1  |     |
| 0699 | Conserved hypothetical                        |             |   |   | 2.2  | 2.1  |      | 2.3  | 2.2 |
| 0707 | Response regulator, transcriptional regulator | <i>ciaR</i> |   |   | 3.5  | 3.2  | 2.8  | 2.8  |     |
| 0708 | Sensor histide kinase CiaH                    | <i>ciaH</i> |   |   | 3.5  | 2.8  | 3.1  | 3.0  |     |
| 0714 | P-glycolate phosphatase                       | <i>gph</i>  |   |   | 3.2  | 2.8  |      |      |     |

|      |                                                       |                     |          |   |            |            |             |             |            |
|------|-------------------------------------------------------|---------------------|----------|---|------------|------------|-------------|-------------|------------|
| 0715 | DNA gyrase subunit B                                  | <b><i>gyrB</i></b>  |          |   | <b>2.7</b> | <b>2.2</b> |             |             |            |
| 0716 | Cell division regulator                               | <b><i>ezrA</i></b>  |          |   | <b>2.3</b> |            |             |             |            |
| 0717 | Transposase                                           |                     |          |   | <b>5.4</b> | <b>3.9</b> |             |             |            |
| 0718 | Transposase                                           |                     |          |   | <b>5.2</b> | <b>3.8</b> | <b>3.1</b>  | <b>3.1</b>  |            |
| 0720 | Hypothetical                                          |                     |          |   |            |            |             |             | <b>2.0</b> |
| 0721 | Conserved hypothetical                                |                     |          |   | <b>8.5</b> | <b>6.7</b> | <b>4.7</b>  | <b>4.6</b>  |            |
| 0722 | Transposase                                           |                     |          |   |            |            | <b>4.2</b>  | <b>4.5</b>  |            |
| 0723 | Degenerate transposase                                |                     |          |   |            |            |             | <b>2.1</b>  |            |
| 0725 | ATP dependent protease                                |                     |          |   | -2.3       | -2.0       |             |             |            |
| 0728 | ABCT ATP-binding protein-Gln                          | <b><i>glnQ</i></b>  |          |   | -2.0       | -2.0       |             |             |            |
| 0744 | Pyrimidine nucleoside phosphorylase                   | <b><i>pdp</i></b>   | <b>4</b> | → | <b>1.9</b> |            |             |             |            |
| 0745 | Deoxyribose-phosphate aldolase                        | <b><i>deoC</i></b>  | <b>4</b> | → | <b>1.9</b> |            |             |             |            |
| 0746 | Cytidine deaminase                                    | <b><i>cdd</i></b>   | <b>4</b> | → | <b>2.0</b> |            |             |             |            |
| 0747 | Conserved hypothetical                                |                     | <b>4</b> | → | <b>2.2</b> |            |             |             |            |
| 0748 | ABCT ATP-binding-ribose/galactose                     |                     | <b>4</b> | → | <b>2.4</b> |            | <b>2.1</b>  | <b>2.1</b>  |            |
| 0749 | ABCT membrane-spanning permease-ribose/galactose      |                     | <b>4</b> | → | <b>2.1</b> |            |             |             |            |
| 0750 | ABCT membrane-spanning permease-ribose/galactose      |                     | <b>4</b> | → | <b>2.1</b> |            |             |             |            |
| 0751 | Degenerate transposase (orf1)                         |                     | <b>4</b> | → | <b>5.3</b> | <b>4.3</b> | <b>4.3</b>  | <b>4.4</b>  |            |
| 0752 | Degenerate transposase (orf1)                         |                     | <b>4</b> | → | <b>3.2</b> |            | <b>3.6</b>  | <b>3.6</b>  |            |
| 0753 | Degenerate transposase (orf2)                         |                     | <b>4</b> | → | <b>4.0</b> | <b>3.3</b> | <b>2.8</b>  | <b>2.8</b>  |            |
| 0754 | Degenerate transposase (orf2)                         |                     | <b>4</b> | → | <b>3.6</b> |            | <b>2.5</b>  | <b>2.6</b>  |            |
| 0765 | Degenerate transposase (orf2)                         |                     |          |   | <b>3.0</b> |            |             |             |            |
| 0766 | Degenerate transposase (orf2)                         |                     |          |   | <b>4.3</b> | <b>1.9</b> |             |             |            |
| 0767 | Transposase (orf1)                                    |                     |          |   | <b>3.6</b> |            |             |             |            |
| 0771 | ABCT ATP-binding-unknown substrate                    |                     |          |   | <b>2.0</b> |            |             |             |            |
| 0773 | Conserved hypothetical                                |                     |          |   | <b>2.2</b> |            |             |             |            |
| 0775 | Conserved hypothetical                                |                     |          |   | <b>2.6</b> |            |             |             |            |
| 0778 | Transcriptional repressor of the fructose operon      | <b><i>fruR</i></b>  |          |   | -2.9       | -2.2       |             |             |            |
| 0779 | Fructose-1-P kinase                                   | <b><i>fruB</i></b>  |          |   | -2.7       | -2.1       |             |             |            |
| 0780 | Fructose specific-P-transferase system IIBC component | <b><i>fruA</i></b>  |          |   | -2.0       |            |             |             |            |
| 0782 | Hypothetical                                          |                     |          |   | -3.3       | -3.2       |             |             |            |
| 0783 | Probable pyridoxal-P dependent aminotransferase       |                     |          |   | -2.1       | -2.2       |             |             |            |
| 0784 | Thiamin biosynthesis                                  | <b><i>thil</i></b>  |          |   |            |            | -2.5        | -2.5        |            |
| 0785 | Hypothetical                                          |                     |          |   |            |            |             |             | -2.0       |
| 0788 | Hypothetical                                          |                     |          |   |            |            | -2.0        | -2.0        |            |
| 0798 | Hypothetical                                          |                     |          |   |            |            | <b>2.1</b>  | <b>2.1</b>  |            |
| 0812 | ABCT ATP-binding-unknown substrate                    |                     |          |   |            |            | <b>2.6</b>  | <b>2.6</b>  |            |
| 0815 | Degenerate transposase                                |                     |          |   |            |            |             |             | -2.0       |
| 0830 | 23S rRNA pseudouridine synthase                       | <b><i>rluD</i></b>  |          |   | <b>1.8</b> |            |             |             |            |
| 0831 | Choline binding protein E                             | <b><i>cbpE</i></b>  |          |   | <b>2.0</b> |            |             |             |            |
| 0839 | Conserved hypothetical                                |                     |          |   | <b>2.3</b> |            |             |             |            |
| 0856 | DNA-binding, bind donor DNA                           | <b><i>comEA</i></b> |          |   |            |            | <b>10.2</b> | <b>10.7</b> |            |
| 0857 | DNA entry pore                                        | <b><i>comEC</i></b> |          |   |            |            | <b>14.0</b> | <b>14.1</b> |            |
| 0858 | Hypothetical                                          |                     |          |   |            |            | <b>3.2</b>  | <b>3.2</b>  |            |
| 0859 | Hypothetical                                          |                     |          |   |            |            | <b>3.4</b>  | <b>3.4</b>  |            |
| 0860 | Hypothetical                                          |                     |          |   |            |            | <b>4.4</b>  | <b>4.4</b>  |            |

|      |                                                     |                    |            |            |            |            |            |
|------|-----------------------------------------------------|--------------------|------------|------------|------------|------------|------------|
| 0865 | Dihydroorotate DH electron transfer subunit         | <b><i>pyrK</i></b> |            |            |            |            | <b>4.2</b> |
| 0868 | Fibronectin-binding protein-like protein A          | <b><i>flpA</i></b> | -3.2       | -2.8       | -2.8       | -2.9       |            |
| 0869 | Conserved hypothetical                              |                    | -2.5       | -2.4       |            |            |            |
| 0872 | Formamidopyrimidine-DNA glycosylase                 | <b><i>mutM</i></b> |            |            | -2.1       |            |            |
| 0873 | Conserved hypothetical                              |                    | -2.1       |            |            | -2.1       |            |
| 0881 | DNA postentry processing protein                    | <b><i>coiA</i></b> |            |            | <b>6.4</b> | <b>6.0</b> |            |
| 0886 | Degenerate transposase (orf1)                       |                    | <b>6.6</b> |            | <b>4.5</b> | <b>4.3</b> |            |
| 0898 | Degenerative transposase                            |                    |            |            | <b>2.6</b> | <b>2.9</b> |            |
| 0904 | Conserved hypothetical                              |                    |            | -2.4       |            |            |            |
| 0905 | Cationic amino acid transporter - APC Superfamily   |                    |            | -2.0       |            |            |            |
| 0906 | Lipoprotein                                         | <b><i>lmb</i></b>  |            | -2.0       |            |            |            |
| 0909 | Hypothetical                                        |                    |            |            |            |            | -2.1       |
| 0910 | Pneumococcal histidine triad protein E precursor    | <b><i>phtE</i></b> |            |            |            |            | -3.2       |
| 0914 | Ferrochelatase                                      | <b><i>hemH</i></b> | -4.9       | -3.6       |            |            | -3.7       |
| 0915 | Large conductance mechano-sensitive ion channel     | <b><i>mscL</i></b> | -4.8       | -4.7       |            |            |            |
| 0917 | Citrulline cluster-linked gene                      | <b><i>ccl</i></b>  | -3.1       | -3.1       | -2.4       | -2.3       |            |
| 0918 | Asp beta-semialdehyde DH                            | <b><i>asd</i></b>  | -2.2       | -2.3       |            |            |            |
| 0933 | Hypothetical                                        |                    | <b>2.7</b> |            |            |            |            |
| 0934 | ABCT substrate-binding-iron                         | <b><i>piaA</i></b> |            | -2.4       |            |            |            |
| 0940 | Hypothetical                                        |                    | <b>2.1</b> |            |            |            |            |
| 0943 | Hypothetical                                        |                    |            |            |            |            | -2.3       |
| 0980 | Conserved hypothetical                              |                    | <b>2.0</b> |            |            |            |            |
| 0981 | Glycosyltransferase                                 | <b><i>cpoA</i></b> | <b>2.0</b> |            |            |            |            |
| 0982 | Conserved hypothetical                              |                    | <b>2.1</b> | <b>2.0</b> |            |            |            |
| 0983 | Hypothetical                                        |                    | <b>3.1</b> | <b>2.8</b> |            |            |            |
| 0987 | Degenerate transposase                              |                    | <b>4.2</b> |            |            |            |            |
| 0988 | Transposase                                         |                    | <b>3.5</b> |            |            |            |            |
| 0993 | Degenerate transposase                              |                    | <b>3.1</b> |            | <b>2.7</b> | <b>2.7</b> |            |
| 0996 | DNA repair protein                                  | <b><i>radC</i></b> |            |            | <b>4.8</b> | <b>4.6</b> |            |
| 0997 | Conserved hypothetical                              |                    |            |            | <b>3.1</b> | <b>3.0</b> |            |
| 0998 | Conserved hypothetical                              |                    | <b>2.0</b> |            |            |            |            |
| 0999 | Hypothetical                                        |                    | <b>2.5</b> |            | <b>2.4</b> | <b>2.5</b> |            |
| 1017 | Riboflavin biosynthesis protein                     | <b><i>mreA</i></b> | <b>2.1</b> |            | <b>3.2</b> | <b>3.2</b> |            |
| 1018 | Conserved hypothetical                              |                    |            |            | <b>2.7</b> | <b>2.6</b> |            |
| 1023 | ABCT membrane-spanning permease                     |                    | <b>2.0</b> | <b>2.3</b> |            |            |            |
| 1026 | Hypothetical                                        |                    |            |            | -3.9       | -4.1       |            |
| 1028 | Glyceraldehyde-3-P DH                               | <b><i>gapN</i></b> | -3.6       |            |            |            |            |
| 1043 | Conserved hypothetical                              |                    | -2.8       | -2.3       |            |            |            |
| 1044 | Ribonuclease HII                                    | <b><i>rnhB</i></b> | -2.5       |            |            |            |            |
| 1045 | Conserved hypothetical                              |                    | -2.1       | -2.0       |            |            |            |
| 1061 | Pneumococcal histidine triad protein A              | <b><i>phtA</i></b> | <b>3.1</b> | <b>2.2</b> | <b>2.1</b> | <b>2.2</b> |            |
| 1064 | Glutaredoxin-like protein                           | <b><i>nrdH</i></b> | <b>4.4</b> |            | <b>2.1</b> | <b>2.1</b> |            |
| 1065 | Ribonucleoside-diphosphate reductase, subunit alpha | <b><i>nrdE</i></b> | <b>3.9</b> |            | <b>2.6</b> | <b>3.0</b> |            |
| 1066 | Ribonucleoside-diP reductase 2, subunit beta        | <b><i>nrdF</i></b> | <b>4.5</b> | <b>2.2</b> | <b>3.3</b> | <b>3.9</b> |            |
| 1070 | PTS system, lactose-specific IIBC component         | <b><i>lacE</i></b> | -3.9       | -3.1       |            |            |            |
| 1071 | PTS system, lactose-specific IIA component          | <b><i>lacF</i></b> | -5.2       |            |            |            |            |

|      |                                                                                 |              |           |   |            |            |            |            |
|------|---------------------------------------------------------------------------------|--------------|-----------|---|------------|------------|------------|------------|
| 1072 | Antiterminator                                                                  | <i>lacT</i>  |           |   | -4.5       | -3.8       |            |            |
| 1073 | Tagatose 1,6-diphosphate aldolase                                               | <i>lacD</i>  |           |   | -3.3       | -2.5       |            |            |
| 1074 | Tagatose-6-P kinase                                                             | <i>lacC</i>  |           |   | -3.2       |            |            |            |
| 1075 | Galactose-6-P isomerase LacB subunit                                            | <i>lacB</i>  |           |   |            |            | -2.2       | -2.3       |
| 1076 | Galactose-6-P isomerase LacA subunit                                            | <i>lacA</i>  |           |   | -3.1       |            |            |            |
| 1091 | Hypothetical                                                                    |              |           |   | -3.4       |            | -2.5       | -2.5       |
| 1094 | Conserved hypothetical                                                          |              |           |   | -2.0       |            |            |            |
| 1098 | Sortase                                                                         | <i>srtA</i>  |           |   | <b>1.9</b> |            |            |            |
| 1109 | Formate-tetrahydrofolate ligase                                                 | <i>fhs</i>   |           |   | <b>1.9</b> | <b>1.8</b> |            |            |
| 1120 | ABCT membrane spanning permease-Gln                                             | <i>glnP</i>  |           |   | <b>4.1</b> | <b>3.1</b> |            |            |
| 1121 | ABCT ATP-binding-Gln                                                            | <i>glnQ</i>  |           |   | <b>3.0</b> | <b>2.6</b> |            |            |
| 1122 | Glucose-6-P-1-DH                                                                | <i>zwf</i>   |           |   | <b>4.0</b> | <b>3.1</b> | <b>2.2</b> | <b>2.5</b> |
| 1129 | Hypothetical                                                                    |              | <b>10</b> | ← | -2.8       |            |            |            |
| 1130 | Hypothetical                                                                    |              | <b>10</b> | ← | -2.7       |            |            |            |
| 1135 | 3-isopropylmalate DH                                                            | <i>leuB</i>  | <b>10</b> | ← | -2.7       |            |            |            |
| 1136 | 2-isopropylmalate synthase                                                      | <i>leuA</i>  | <b>10</b> | ← | -3.0       |            |            |            |
| 1137 | 2-isopropylmalate synthase                                                      | <i>leuA</i>  | <b>10</b> | ← | -2.8       |            |            |            |
| 1138 | Hypothetical                                                                    |              | <b>10</b> | ← | -2.9       |            |            |            |
| 1139 | Copper sensitivity                                                              | <i>cutC</i>  | <b>10</b> | ← | -3.3       | -2.3       |            |            |
| 1140 | Conserved hypothetical                                                          |              | <b>10</b> | ← | -2.6       |            |            |            |
| 1141 | DNA topoisomerase I                                                             | <i>topA</i>  | <b>10</b> | ← | -6.2       | -5.4       | -3.6       | -3.6       |
| 1142 | Conserved hypothetical                                                          |              | <b>10</b> | ← | -2.7       | -2.5       |            |            |
| 1150 | Conserved hypothetical                                                          |              |           |   | -3.1       | -2.3       |            |            |
| 1151 | Required for phosphorylcholine incorporation in teichoic and lipoteichoic acids | <i>licD1</i> |           |   | -3.1       | -2.5       | -2.3       | -2.3       |
| 1152 | licD Protein                                                                    | <i>licD2</i> |           |   | -2.6       |            | -2.3       | -2.2       |
| 1172 | CrcB protein                                                                    | <i>crcB</i>  |           |   | -2.5       |            | -2.0       | -2.0       |
| 1173 | CrcB protein                                                                    | <i>crcB</i>  |           |   |            |            | -2.0       |            |
| 1176 | Conserved hypothetical                                                          |              |           |   | -3.1       |            |            |            |
| 1182 | Hypothetical                                                                    |              |           |   | -2.2       | -2.8       |            |            |
| 1183 | ABCT ATP-binding protein                                                        |              |           |   | -2.6       | -3.2       |            |            |
| 1194 | ABCT substrate-binding protein - oligopeptide                                   | <i>appA</i>  |           |   |            | -3.3       |            |            |
| 1195 | Conserved hypothetical                                                          |              |           |   |            | -2.9       |            |            |
| 1197 | Degenerate transposase (orf2)                                                   |              |           |   | -2.8       | -3.1       |            |            |
| 1201 | Hypothetical                                                                    |              |           |   | -4.7       | -3.5       |            |            |
| 1202 | ABCT ATP-binding protein-unknown substrate                                      |              |           |   | -5.2       | -4.7       |            |            |
| 1203 | ABCT ATP-binding/membrane spanning protein                                      |              |           |   | -5.2       | -4.9       |            |            |
| 1204 | Prolyl oligopeptidase                                                           | <i>ptrB</i>  |           |   | -5.1       | -4.6       | -2.6       | -2.7       |
| 1205 | Conserved hypothetical                                                          |              |           |   | -4.3       | -5.1       | -2.5       | -2.5       |
| 1207 | Hypothetical                                                                    |              |           |   |            |            |            | -3.1       |
| 1208 | Hypothetical                                                                    |              |           |   |            |            |            | -3.0       |
| 1237 | Hypothetical                                                                    |              |           |   |            |            |            | -2.1       |
| 1238 | ABCT ATP-binding protein-unknown substrate                                      |              |           |   |            |            | -2.9       | -4.7       |
| 1250 | Conserved hypothetical                                                          |              |           |   | -2.7       |            |            |            |
| 1251 | ABCT substrate-binding-Gln                                                      | <i>glnH</i>  |           |   | -2.6       | -2.3       |            |            |
| 1252 | Phosphate transport system regulatory protein                                   | <i>phoU</i>  |           |   |            |            | -2.2       | -2.3       |



|      |                                               |              |    |   |            |            |            |            |
|------|-----------------------------------------------|--------------|----|---|------------|------------|------------|------------|
| 1253 | ABCT ATP-binding-P                            | <i>pstB1</i> |    |   | -2.3       | -2.1       |            | -2.3       |
| 1254 | ABCT ATP-binding-P                            | <i>pstB2</i> |    |   | -2.3       | -2.2       |            |            |
| 1255 | ABCT membrane-spanning permease-P             | <i>pstA</i>  |    |   | -2.3       | -2.2       | -3.3       | -3.5       |
| 1256 | ABCT membrane-spanning permease-P             | <i>pstC</i>  |    |   | -2.6       | -2.4       |            |            |
| 1257 | ABCT substrate-binding-P                      | <i>pstS1</i> |    |   | -2.6       | -2.3       |            |            |
| 1270 | Ser-P kinase/phosphatase                      | <i>hprK</i>  |    |   | <b>1.8</b> |            |            |            |
| 1292 | Conserved hypothetical                        |              |    |   | -3.1       | -2.6       |            |            |
| 1301 | Conserved hypothetical                        |              |    |   |            |            | 2.0        | <b>2.0</b> |
| 1310 | Peptide deformylase                           | <i>fms</i>   |    |   | -2.9       | -2.8       |            |            |
| 1314 | ABCT ATP-binding-Asp/Glu                      |              | 11 | ← | -3.6       | -3.1       | -3.3       | -3.3       |
| 1315 | ABCT membrane-spanning permease-Asp/Glu       |              | 11 | ← | -3.3       | -3.0       | -3.2       | -3.3       |
| 1316 | Conserved hypothetical                        |              | 11 | ← | -3.1       | -2.8       |            |            |
| 1317 | O6-methylguanine-DNA methyltransferase        | <i>ogt</i>   | 11 | ← | -4.3       | -3.6       |            |            |
| 1318 | Hypothetical                                  |              | 11 | ← | -3.1       | -3.1       |            |            |
| 1319 | Hypothetical                                  |              | 11 | → | -4.0       | -3.2       |            |            |
| 1320 | Conserved hypothetical                        |              | 11 | → | -3.1       |            | -2.7       | -2.6       |
| 1321 | Conserved hypothetical                        |              | 11 | ← | -4.5       | -4.0       | -2.9       | -3.0       |
| 1322 | Pyridoxine biosynthesis                       | <i>pdx1</i>  | 11 | ← | -4.7       | -3.9       |            |            |
| 1323 | NADH oxidase                                  | <i>noxA</i>  | 11 | ← | -2.2       | -2.7       |            |            |
| 1335 | Oxidoreductase                                | <i>mocA</i>  |    |   | -2.5       |            |            | -2.4       |
| 1336 | DEAD RNA helicase                             |              |    |   | -3.0       | -2.4       |            |            |
| 1337 | Degenerate transposase                        |              |    |   |            |            | <b>3.0</b> | <b>3.0</b> |
| 1338 | Degenerate transposase                        |              |    |   | <b>3.5</b> |            | <b>3.2</b> | <b>3.1</b> |
| 1339 | Degenerate transposase                        |              |    |   | <b>3.3</b> |            | <b>2.3</b> | <b>2.3</b> |
| 1340 | Degenerate transposase                        |              |    |   | <b>4.2</b> | <b>3.2</b> | <b>2.8</b> | <b>2.8</b> |
| 1341 | Degenerate transposase                        |              |    |   | <b>5.8</b> |            |            |            |
| 1342 | Degenerate transposase                        |              |    |   |            |            | <b>2.4</b> | <b>2.4</b> |
| 1346 | Hypothetical                                  |              |    |   | -3.6       |            |            |            |
| 1353 | ABCT substrate-binding protein-Gln            | <i>glnH</i>  | 12 | ← | -3.2       | -2.7       |            |            |
| 1354 | ABCT ATP-binding protein-Gln                  | <i>glnQ</i>  | 12 | ← | -3.0       | -2.5       |            |            |
| 1355 | ABCT membrane-spanning permease-Gln           | <i>glnP</i>  | 12 | ← | -2.1       |            |            |            |
| 1358 | Conserved hypothetical                        |              | 12 | → |            |            |            | -2.0       |
| 1359 | Proton-ATPase, F1 sector, epsilon-subunit     | <i>atpe</i>  | 12 | ← | -2.5       | -2.6       |            |            |
| 1360 | Proton-ATPase, F1 sector, beta-subunit        | <i>atpb</i>  | 12 | ← | -3.1       | -3.2       |            |            |
| 1361 | Proton-ATPase, F1 sector, gamma-subunit       | <i>atpg</i>  | 12 | ← | -3.2       | -3.0       |            |            |
| 1362 | Proton-ATPase, F1 sector, alpha-subunit       | <i>atpa</i>  | 12 | ← | -3.5       | -3.4       | -3.4       | -3.5       |
| 1363 | Proton-ATPase, F1 sector, delta-subunit       | <i>atpd</i>  | 12 | ← | -4.0       | -3.9       | -2.9       |            |
| 1364 | Proton-ATPase, F0 sector, subunit b           | <i>atpB</i>  | 12 | ← | -3.6       | -3.2       |            |            |
| 1365 | Proton-ATPase, F0 sector, subunit a           | <i>atpA</i>  | 12 | ← | -3.2       | -3.1       |            |            |
| 1366 | Proton-ATPase, F0 sector, subunit c           | <i>atpC</i>  | 12 | ← | -3.3       | -3.0       |            |            |
| 1367 | Transposase                                   |              |    |   |            |            |            | -2.1       |
| 1378 | ABCT                                          |              |    |   |            |            |            | <b>2.8</b> |
| 1383 | Polysaccharide transporter                    |              |    |   | -2.0       |            |            |            |
| 1384 | UDP-N-acetylmuramoyl-L-Ala-D-Glu-L-Lys ligase | <i>murE</i>  |    |   | -2.1       |            |            |            |
| 1386 | Hypothetical                                  |              |    |   | <b>2.6</b> | <b>2.1</b> |            |            |
| 1387 | Hypothetical                                  |              |    |   | <b>2.4</b> | <b>2.2</b> | <b>2.2</b> | <b>2.1</b> |
| 1388 | Hypothetical                                  |              |    |   | <b>2.3</b> | <b>2.0</b> |            |            |

|      |                                               |                    |            |            |            |            |            |
|------|-----------------------------------------------|--------------------|------------|------------|------------|------------|------------|
| 1389 | Manganese-dependent inorganic pyrophosphatase | <b><i>ppaC</i></b> | <b>1.9</b> |            |            |            |            |
| 1390 | Conserved hypothetical                        |                    | <b>2.7</b> | <b>2.4</b> |            |            |            |
| 1391 | Conserved hypothetical                        |                    | <b>2.3</b> | <b>2.1</b> |            |            |            |
| 1392 | Conserved hypothetical                        |                    | <b>2.7</b> | <b>2.6</b> |            |            |            |
| 1393 | Hypothetical                                  |                    | <b>2.5</b> | <b>2.1</b> |            |            |            |
| 1397 | Asn-tRNA synthetase                           | <b><i>asnS</i></b> | -2.2       | -2.0       |            |            |            |
| 1398 | Conserved hypothetical                        |                    | -2.1       | -2.0       |            |            |            |
| 1399 | Asp aminotransferase                          | <b><i>aspB</i></b> | -2.3       | -2.0       | -2.0       |            |            |
| 1400 | Conserved hypothetical                        |                    | -2.6       | -2.2       | -2.5       | -2.5       |            |
| 1402 | Hypothetical                                  |                    | <b>4.5</b> |            |            |            |            |
| 1407 | Hypothetical                                  |                    | -2.4       | -2.1       |            |            |            |
| 1408 | Formylmethionine deformylase                  | <b><i>def</i></b>  | -2.9       | -2.6       |            |            |            |
| 1420 | Hypothetical                                  |                    | <b>2.6</b> | <b>2.4</b> |            |            |            |
| 1430 | DNA binding, peroxide resistance              | <b><i>dpr</i></b>  | -2.3       | -2.4       |            |            |            |
| 1433 | Conserved hypothetical                        |                    | <b>2.5</b> | <b>2.0</b> |            |            |            |
| 1434 | Homoserine O-succinyltransferase              | <b><i>metA</i></b> | <b>2.4</b> |            |            |            |            |
| 1435 | Adenine P-ribosyltransferase                  | <b><i>apt</i></b>  | <b>2.0</b> |            |            |            |            |
| 1436 | Conserved hypothetical                        |                    | <b>3.1</b> |            |            |            |            |
| 1438 | Isochorismatase                               | <b><i>entB</i></b> | <b>1.9</b> |            |            |            |            |
| 1439 | Transcriptional pleiotropic repressor         | <b><i>codY</i></b> | <b>2.0</b> |            |            |            |            |
| 1440 | Conserved hypothetical                        |                    |            | -2.3       |            |            |            |
| 1441 | Major facilitator:Oxalate:formate antiporter  | <b><i>oxIT</i></b> | <b>8.1</b> | <b>3.3</b> |            |            |            |
| 1446 | Degenerate transposase (orf2)                 |                    |            |            | <b>2.0</b> | <b>2.0</b> |            |
| 1447 | Degenerate transposase (orf2)                 |                    |            |            | <b>2.9</b> | <b>2.9</b> |            |
| 1448 | Degenerate transposase (orf1)                 |                    |            |            | <b>4.1</b> | <b>4.3</b> |            |
| 1452 | Hypothetical                                  |                    |            |            | <b>3.5</b> | <b>3.5</b> |            |
| 1453 | Major facilitator superfamily transporter     |                    | <b>2.2</b> |            |            |            |            |
| 1466 | Hypothetical                                  |                    | -3.7       | -3.2       | -4.3       | -4.1       |            |
| 1470 | Hypothetical                                  |                    | -3.4       |            | -2.3       |            |            |
| 1471 | Hypothetical                                  |                    | -4.3       | -2.9       |            |            |            |
| 1472 | Thr-tRNA synthetase 1                         | <b><i>thrS</i></b> | -2.5       |            |            |            |            |
| 1477 | Conserved hypothetical                        |                    | <b>2.5</b> |            |            |            |            |
| 1478 | Hypothetical                                  |                    | <b>2.8</b> |            |            |            |            |
| 1479 | Conserved hypothetical                        |                    | <b>2.2</b> |            |            |            |            |
| 1480 | Iron-dependent transcriptional regulator      | <b><i>marR</i></b> | <b>2.2</b> |            |            |            |            |
| 1481 | Hypothetical                                  |                    | <b>2.6</b> |            |            | 2.0        |            |
| 1482 | Hypothetical                                  |                    | <b>3.5</b> | <b>2.5</b> |            |            |            |
| 1483 | Hypothetical                                  |                    | <b>3.0</b> |            |            |            |            |
| 1484 | Hypothetical                                  |                    | <b>2.0</b> |            |            |            | <b>2.0</b> |
| 1486 | Conserved hypothetical                        |                    | -2.8       |            |            |            |            |
| 1487 | GTP pyrophosphokinase                         | <b><i>relA</i></b> | -2.4       | -2.1       |            |            |            |
| 1490 | Conserved hypothetical                        |                    | -4.4       | -2.6       | -2.8       | -2.7       |            |
| 1491 | Endopeptidase O                               | <b><i>pepO</i></b> | -3.7       | -2.5       |            |            |            |
| 1495 | Thioredoxin-linked thiol peroxidase           | <b><i>tpxD</i></b> |            | -3.3       |            |            |            |
| 1501 | Hypothetical                                  |                    |            |            |            | <b>2.2</b> |            |
| 1518 | Conserved hypothetical                        |                    | -2.6       | -2.8       |            |            |            |
| 1531 | Neuraminidase B                               | <b><i>nanB</i></b> |            |            |            |            | -2.1       |
| 1536 | Neuraminidase A                               | <b><i>nanA</i></b> | <b>3.4</b> |            |            |            |            |

|      |                                           |             |             |            |            |            |
|------|-------------------------------------------|-------------|-------------|------------|------------|------------|
| 1537 | Hypothetical                              |             | <b>5.5</b>  | <b>4.2</b> |            |            |
| 1539 | ATP-dependent DNA helicase                | <b>recG</b> | <b>2.1</b>  | <b>2.1</b> |            |            |
| 1540 | Ala racemase                              | <b>alr</b>  | <b>2.1</b>  | <b>2.0</b> |            |            |
| 1549 | Hypothetical                              |             |             |            | -2.2       |            |
| 1558 | Conserved hypothetical                    |             | <b>2.4</b>  |            |            |            |
| 1559 | ABCT ATP-binding                          |             | <b>3.6</b>  | <b>2.4</b> |            | <b>3.3</b> |
| 1560 | Hypothetical                              |             | <b>5.2</b>  | <b>3.2</b> | <b>4.5</b> | <b>4.9</b> |
| 1561 | LPxTG protein. Sialidase A precursor      | <b>natB</b> |             |            | <b>2.9</b> | <b>2.8</b> |
| 1563 | Degenerate transposase                    |             | <b>3.9</b>  |            | <b>3.3</b> | <b>3.0</b> |
| 1585 | Conserved hypothetical                    |             |             |            | <b>2.9</b> | <b>2.6</b> |
| 1598 | Ser/Thr transporter                       | <b>dctA</b> | -3.8        | -3.1       | -2.3       | -2.3       |
| 1599 | Conserved hypothetical                    |             | -2.5        | -2.0       |            |            |
| 1602 | Thioredoxin reductase                     | <b>trxA</b> | <b>2.1</b>  |            |            |            |
| 1603 | Conserved hypothetical                    |             | <b>2.9</b>  |            |            |            |
| 1612 | Conserved hypothetical                    |             | -2.4        |            | -2.3       | -2.3       |
| 1620 | ABCT substrate-binding-sugar              |             | -2.1        | -2.2       |            |            |
| 1621 | Sucrose operon repressor                  | <b>scrR</b> | -2.0        | -2.2       |            |            |
| 1624 | Conserved hypothetical                    |             | <b>1.9</b>  |            |            |            |
| 1627 | Conserved hypothetical                    |             |             |            | <b>2.1</b> | <b>2.1</b> |
| 1628 | Peptidase-Mtase, process CglC, CglD, CglF | <b>cclA</b> |             |            | <b>7.1</b> | <b>6.8</b> |
| 1629 | Conserved hypothetical                    |             | <b>2.0</b>  |            | <b>5.7</b> | <b>5.7</b> |
| 1630 | Hypothetical                              |             | <b>2.0</b>  |            | <b>5.9</b> | <b>6.0</b> |
| 1631 | Trp synthase alpha chain                  | <b>trpA</b> | -3.1        |            |            |            |
| 1632 | Trp synthase beta chain                   | <b>trpB</b> | -2.9        |            |            |            |
| 1633 | P-ribosylanthranilate isomerase.          | <b>trpF</b> | -4.1        |            |            |            |
| 1634 | Indole-3-glycerol-P synthase              | <b>trpC</b> | -2.9        |            |            |            |
| 1635 | Anthranilate P-ribosyltransferase         | <b>trpD</b> | -4.1        |            |            |            |
| 1636 | Anthranilate synthase component II        | <b>trpG</b> | -3.0        |            |            |            |
| 1637 | Anthranilate synthase component I         | <b>trpE</b> | -3.4        |            |            |            |
| 1638 | Hypothetical                              |             | -3.8        | -3.7       |            |            |
| 1640 | Hypothetical                              |             |             | <b>4.1</b> |            |            |
| 1654 | Conserved hypothetical                    |             | -2.7        | -2.1       |            |            |
| 1655 | Conserved hypothetical                    |             | -3.1        | -2.3       |            |            |
| 1656 | ABCT ATP-binding/membrane spanning        |             | -2.7        | -2.2       |            |            |
| 1657 | ABCT ATP-binding/membrane spanning        |             | -3.3        | -2.6       | -2.4       | -2.4       |
| 1658 | Conserved hypothetical                    |             | -3.0        | -2.4       |            |            |
| 1659 | Hypothetical                              |             | -2.8        |            |            |            |
| 1664 | Restriction system                        | <b>dpnD</b> |             | -3.0       |            |            |
| 1665 | Type II restriction enzyme DpnI           | <b>dpnC</b> | -3.5        | -3.3       | -3.0       | -3.0       |
| 1666 | Conserved hypothetical                    |             | -7.0        | -7.5       |            |            |
| 1672 | Cation efflux system protein              | <b>czcD</b> | <b>16.4</b> | <b>7.3</b> |            |            |
| 1673 | Conserved hypothetical                    |             | -3.2        |            | -2.0       |            |
| 1675 | Transposase                               |             | <b>3.5</b>  |            |            |            |
| 1681 | Hypothetical                              |             | -3.1        |            |            |            |
| 1682 | Glu aminopeptidase                        | <b>pepA</b> | -3.0        | -2.5       |            |            |
| 1698 | Dextran glucosidase                       | <b>dexS</b> | -6.2        | -5.3       |            |            |
| 1699 | PTS trehalose-specific IIBC component     | <b>treP</b> | -5.8        | -5.2       |            |            |
| 1701 | Degenerate transposase                    |             | <b>3.3</b>  |            |            | <b>3.3</b> |

|      |                                               |   |   |              |      |      |      |      |      |      |
|------|-----------------------------------------------|---|---|--------------|------|------|------|------|------|------|
| 1702 | Degenerate transposase                        |   |   |              | 3.3  |      | 2.4  | 2.4  |      |      |
| 1716 | Degenerate transposase                        |   |   |              | 8.5  | 4.6  |      |      |      |      |
| 1719 | Conserved hypothetical                        |   |   |              |      | 2.4  |      |      |      |      |
| 1721 | Degenerate transposase                        |   |   |              | 5.5  | 3.2  |      |      |      |      |
| 1722 | Chaperonin GroEL                              |   |   | <i>groEL</i> |      |      | 3.2  |      |      |      |
| 1723 | Cochaperonin GroES                            |   |   | <i>groES</i> | 2.1  |      |      |      |      |      |
| 1729 | Conserved hypothetical                        |   |   |              |      |      | -3.4 | -3.5 |      |      |
| 1730 | Hypothetical                                  |   |   |              | -4.6 | -4.5 | -3.4 | -3.4 |      |      |
| 1731 | Hypothetical                                  |   |   |              | -5.5 | -5.3 | -2.8 | -2.7 |      |      |
| 1732 | Conserved hypothetical                        |   |   |              | -3.6 | -3.5 |      |      |      |      |
| 1733 | Hypothetical                                  |   |   |              | -3.6 | -3.6 |      |      |      |      |
| 1734 | ABCT ATP-binding                              |   |   |              | 5.9  | 5.6  | 2.7  | 2.5  |      |      |
| 1735 | ABCT ATP-binding                              |   |   |              | 6.5  |      |      |      |      |      |
| 1736 | ABCT ATP-binding                              |   |   |              | 7.2  | 5.4  | 2.0  |      |      |      |
| 1737 | Conserved hypothetical                        |   |   |              | 8.7  | 6.6  | 2.8  | 2.4  |      |      |
| 1738 | Conserved hypothetical                        |   |   |              | 2.1  | 2.1  |      |      |      |      |
| 1750 | Hypothetical                                  | 5 | ← |              | 3.2  |      |      | 2.7  |      |      |
| 1751 | Hypothetical                                  | 5 | ← |              | 3.5  |      |      |      |      |      |
| 1752 | Hypothetical                                  | 5 | ← |              | 3.3  |      | 2.1  |      |      |      |
| 1753 | Hypothetical                                  | 5 | ← |              | 3.6  |      |      |      |      |      |
| 1755 | Hypothetical                                  | 5 | ← |              | 1.8  |      | 5.3  | 5.5  |      |      |
| 1756 | DNA-damage-inducible protein                  |   |   | <i>dinF</i>  | 5    | ←    | 4.5  | 4.8  |      |      |
| 1757 | DNA recombination/repair                      |   |   | <i>recA</i>  | 5    | ←    | 4.3  | 5.0  |      |      |
| 1758 | Membrane protein                              |   |   | <i>cinA</i>  | 5    | ←    | 5.1  | 6.0  |      |      |
| 1762 | Hypothetical                                  | 5 | ← |              |      |      | 7.4  |      |      |      |
| 1763 | Transcriptional activator                     |   |   | <i>plcR</i>  | 5    | ←    | 5.1  | 4.8  | 3.0  |      |
| 1764 | Hypothetical                                  | 5 | → |              | 13.6 | 14.2 |      | 3.8  |      |      |
| 1765 | Hypothetical                                  | 5 | → |              | 14.4 | 12.8 |      |      |      |      |
| 1766 | Hypothetical                                  | 5 | → |              | 18.9 | 13.9 |      |      |      |      |
| 1767 | Bacteriocin formation protein                 |   |   | <i>cylM</i>  | 5    | →    | 26.0 | 15.9 | 5.3  | 5.0  |
| 1768 | Conserved hypothetical                        | 5 | → |              | 23.2 | 14.1 |      |      |      |      |
| 1769 | Hypothetical                                  | 5 | → |              | 21.7 | 13.3 |      |      |      |      |
| 1770 | ABCT ATP-binding/membrane-spanning-hemolysin  |   |   | <i>cylB</i>  | 5    | →    | 21.8 | 12.8 | 2.0  |      |
| 1771 | Subtilisin-like Ser protease                  |   |   | <i>nisP</i>  | 5    | →    | 16.6 | 9.6  | 2.4  |      |
| 1772 | Hypothetical                                  | 5 | → |              | 4.6  | 2.9  | 4.9  | 4.9  | 2.0  |      |
| 1773 | ABCT ATP-binding                              | 5 | → |              | 4.6  | 3.0  |      |      |      |      |
| 1774 | Hypothetical                                  | 5 | → |              | 5.4  |      |      |      |      |      |
| 1775 | Nucleoside di-P kinase                        |   |   | <i>ndk</i>   | 5    | ←    | 4.1  | 3.4  | 3.5  |      |
| 1776 | RNA polymerase, beta subunit                  |   |   | <i>rpoC</i>  | 5    | ←    | 2.3  | 2.0  |      |      |
| 1785 | Asp-ammonia ligase                            |   |   | <i>asnA</i>  |      |      | -2.5 | -2.2 |      |      |
| 1795 | Conserved hypothetical                        |   |   |              | -2.2 |      |      |      |      |      |
| 1796 | Conserved hypothetical                        |   |   |              | -1.9 |      |      |      |      |      |
| 1797 | Pentose-5-P-3-epimerase                       |   |   | <i>rpe</i>   |      |      | -2.1 |      |      |      |
| 1798 | Conserved hypothetical                        |   |   |              | -2.3 |      |      |      |      |      |
| 1799 | Ribosomal RNA small subunit methyltransferase |   |   | <i>rsmA</i>  |      |      | -2.5 |      |      |      |
| 1808 | Potential aminotransferase                    |   |   | <i>aspC</i>  |      |      | -4.3 | -3.5 | -2.3 | -2.4 |
| 1810 | Conserved hypothetical                        |   |   |              | -3.1 | -2.6 |      |      |      |      |

|      |                                             |              |          |            |            |             |             |
|------|---------------------------------------------|--------------|----------|------------|------------|-------------|-------------|
| 1811 | Conserved hypothetical                      |              |          | -4.3       | -3.0       |             | -3.2        |
| 1812 | L-asparaginase                              | <b>asnB</b>  |          | -3.2       |            | -2.0        | -2.1        |
| 1815 | Histidine kinase                            |              |          |            | <b>2.2</b> |             |             |
| 1816 | Conserved hypothetical                      |              |          | <b>2.6</b> | <b>2.7</b> |             |             |
| 1817 | ABCT ATP binding                            |              |          | <b>2.7</b> | <b>2.6</b> | <b>2.2</b>  | <b>2.2</b>  |
| 1818 | Hypothetical                                |              |          | <b>4.8</b> | <b>3.2</b> | <b>3.5</b>  | <b>3.6</b>  |
| 1819 | Competence-specific transcription modulator | <b>comX2</b> |          |            |            | <b>9.6</b>  | <b>9.8</b>  |
| 1826 | Conserved hypothetical                      |              |          | <b>2.2</b> | <b>2.4</b> | <b>3.1</b>  |             |
| 1827 | Transposase                                 |              |          | <b>3.1</b> | <b>2.7</b> |             |             |
| 1828 | Transposase                                 |              |          | <b>2.0</b> |            | <b>4.0</b>  | <b>4.3</b>  |
| 1829 | Nicotinate-nucleotide pyrophosphorylase     | <b>nadC</b>  |          |            |            | <b>3.8</b>  | <b>3.8</b>  |
| 1830 | Conserved hypothetical                      |              |          |            |            | <b>3.9</b>  | <b>3.9</b>  |
| 1837 | Alcohol-acetaldehyde DH                     | <b>adhE</b>  |          | -7.4       |            |             |             |
| 1838 | Hypothetical                                |              |          | -3.3       | -2.8       | -2.8        | -2.7        |
| 1839 | Conserved hypothetical                      |              |          | -3.0       | -2.7       | -2.6        | -2.6        |
| 1840 | Conserved hypothetical                      |              |          | -3.1       | -2.9       |             |             |
| 1841 | Transketolase                               | <b>tktA</b>  |          | -3.9       | -4.6       |             |             |
| 1850 | Hypothetical                                |              |          |            |            |             | <b>2.1</b>  |
| 1857 | Hypothetical                                |              |          |            |            | <b>17.4</b> | <b>16.3</b> |
| 1858 | Membrane protein, cell wall chanel          | <b>cglG</b>  |          |            |            | <b>16.1</b> | <b>16.2</b> |
| 1861 | Membrane protein, cell wall chanel          | <b>cglD</b>  |          |            |            | <b>13.8</b> | <b>14.3</b> |
| 1862 | Membrane protein, cell wall chanel          | <b>cglC</b>  |          |            |            | <b>16.9</b> | <b>17.4</b> |
| 1863 | ABCT, transport of CglC-CglG                | <b>cglB</b>  |          |            |            | <b>14.0</b> | <b>15.5</b> |
| 1864 | ABCT, transport of CglC-CglG                | <b>cglA</b>  |          |            |            |             | <b>9.3</b>  |
| 1865 | Conserved hypothetical                      |              |          | -2.4       |            |             |             |
| 1866 | Zinc-containing alcohol DH                  | <b>adh</b>   |          | -2.5       |            |             |             |
| 1867 | N-acetylglucosamine-6-P deacetylase         | <b>nagA</b>  |          | -2.5       |            | -3.8        | -3.8        |
| 1868 | Hypothetical                                |              |          | -2.1       |            |             |             |
| 1869 | tRNA-guanine transglycosylase               | <b>tgt</b>   |          | -4.1       | -4.1       |             |             |
| 1870 | Hypothetical                                |              |          | -2.5       |            | -2.5        | -2.4        |
| 1872 | Pyrrolidone carboxyl peptidase              |              |          | -3.0       |            |             |             |
| 1873 | Conserved hypothetical                      |              |          |            |            |             | -2.1        |
| 1875 | Conserved hypothetical                      |              |          | -2.2       |            |             |             |
| 1876 | Hypothetical                                |              | <b>6</b> | ←          | <b>3.6</b> | <b>2.9</b>  |             |
| 1877 | Multi antimicrobial extrusion family        |              | <b>6</b> | ←          | <b>3.7</b> | <b>3.1</b>  |             |
| 1878 | Thr synthase                                | <b>thrC</b>  | <b>6</b> | ←          | <b>2.4</b> | <b>2.1</b>  |             |
| 1879 | Hypothetical                                |              | <b>6</b> | ←          | <b>3.0</b> | <b>2.8</b>  | <b>2.2</b>  |
| 1883 | Hypothetical                                |              | <b>6</b> | ←          | <b>5.4</b> | <b>4.9</b>  | <b>6.4</b>  |
| 1884 | Gln amidotransferase                        | <b>guaA</b>  | <b>6</b> | ←          | <b>6.9</b> | <b>6.3</b>  | <b>6.3</b>  |
| 1885 | ABCT ATP-binding-fluoroquinolones           | <b>patB</b>  | <b>6</b> | ←          | <b>3.8</b> | <b>4.1</b>  |             |
| 1886 | Degenerate transposase                      |              | <b>6</b> | →          | <b>3.2</b> | <b>3.8</b>  |             |
| 1887 | ABCT ATP-binding-fluoroquinolones           | <b>patA</b>  | <b>6</b> | ←          | <b>3.7</b> | <b>4.1</b>  | <b>2.8</b>  |
| 1888 | DNA mismatch repair protein                 | <b>hexA</b>  | <b>6</b> | ←          |            | <b>2.1</b>  |             |
| 1897 | ABCT membrane-spanning permease-P           | <b>pstA</b>  |          |            |            |             | <b>2.1</b>  |
| 1898 | ABCT ATP-binding-P                          | <b>pstB</b>  |          |            | <b>2.8</b> |             | <b>2.1</b>  |
| 1899 | Negative regulator of pho regulon           | <b>phoU</b>  |          |            | <b>3.1</b> |             | <b>2.2</b>  |
| 1912 | Hypothetical                                |              |          | -2.0       |            |             |             |
| 1913 | rRNA (guanine-N1)-methyltransferase         | <b>rrmA</b>  |          | -2.7       |            |             |             |

|      |                                                                  |              |          |            |            |            |             |             |            |
|------|------------------------------------------------------------------|--------------|----------|------------|------------|------------|-------------|-------------|------------|
| 1915 | Hypothetical                                                     |              |          | -2.9       | -2.4       |            |             |             |            |
| 1918 | ABCT substrate-binding-maltose                                   | <i>malX</i>  |          | -7.4       | -5.9       |            |             |             |            |
| 1919 | ABCT membrane-spanning permease-maltose                          | <i>malC</i>  |          | -4.8       | -3.2       |            |             |             |            |
| 1920 | ABCT membrane-spanning permease-maltose                          | <i>malD</i>  |          | -4.0       |            |            |             |             |            |
| 1921 | MalA protein                                                     | <i>malA</i>  |          | -4.6       | -3.4       |            |             |             |            |
| 1922 | Maltose operon transcriptional repressor                         | <i>malR</i>  |          | -4.1       | -3.6       |            |             |             |            |
| 1934 | Conserved hypothetical                                           |              |          |            |            |            |             |             | -2.7       |
| 1935 | Dihydroxyacid dehydratase                                        | <i>ilvD</i>  |          | -3.4       | -2.2       |            |             |             |            |
| 1936 | Putative transketolase C-terminal section                        | <i>tktC</i>  |          | -5.0       | -4.0       |            |             |             |            |
| 1937 | Putative transketolase N-terminal section                        | <i>tktN</i>  |          | -4.5       | -3.7       |            |             |             |            |
| 1938 | Conserved hypothetical                                           |              |          | -5.7       | -4.5       |            |             |             |            |
| 1939 | Hypothetical                                                     |              |          | -6.4       | -5.2       |            |             |             |            |
| 1940 | Conserved hypothetical                                           |              |          | -8.7       | -6.2       |            |             |             |            |
| 1942 | Hypothetical                                                     |              |          |            |            |            |             |             | -2.0       |
| 1945 | Choline-binding protein                                          |              |          | -5.2       | -3.1       |            |             |             |            |
| 1951 | Conserved hypothetical                                           |              |          |            |            | -2.2       | -2.1        |             |            |
| 1953 | Conserved hypothetical                                           |              |          | -4.2       | -3.1       |            |             |             |            |
| 1954 | Hypothetical                                                     |              |          |            |            | -2.2       |             |             |            |
| 1958 | Carbamate kinase                                                 | <i>arcC</i>  |          | <b>2.2</b> | <b>2.3</b> |            |             |             |            |
| 1959 | Conserved hypothetical                                           |              |          | <b>2.9</b> | <b>3.1</b> |            |             |             |            |
| 1960 | Conserved hypothetical                                           |              |          | <b>2.9</b> | <b>3.1</b> |            |             |             |            |
| 1962 | Conserved hypothetical                                           |              |          | -2.9       | -3.0       |            |             |             |            |
| 1968 | PTS sugar-specific EII component                                 |              |          |            |            | -2.3       |             |             |            |
| 1971 | Fucose pathway protein                                           |              |          |            |            | -2.1       | -2.0        |             |            |
| 1972 | L-fuculose P aldolase                                            | <i>fucA</i>  |          |            |            | -2.2       | -2.2        |             |            |
| 1979 | D-Ala transfer from undecaprenol-P to the poly(glycerol-P) chain | <i>dltD</i>  |          | -4.0       | -2.6       |            |             |             |            |
| 1980 | D-Ala carrier protein                                            | <i>dltC</i>  |          | -3.2       |            |            |             |             |            |
| 1981 | D-Ala transfer from Dcp to undecaprenol-P                        | <i>dltB</i>  |          | -4.5       | -2.9       | -3.3       | -3.3        |             |            |
| 1982 | D-Ala-D-Ala carrier protein ligase                               | <i>dltA</i>  |          | -4.8       | -3.7       |            |             |             |            |
| 1983 | Conserved hypothetical                                           |              |          | -2.8       |            |            |             |             |            |
| 1992 | Hypothetical                                                     |              |          | -3.2       |            |            |             |             |            |
| 1993 | Chaperonin (heat shock protein 33)                               | <i>hslO</i>  |          |            |            | -2.3       |             |             |            |
| 1994 | Conserved hypothetical                                           |              |          |            |            | -2.0       |             |             |            |
| 2002 | ABCT ATP-binding protein-anion                                   |              | <b>7</b> | ←          | <b>8.5</b> | <b>7.1</b> |             | <b>4.4</b>  |            |
| 2003 | Conserved hypothetical                                           |              | <b>7</b> | ←          | <b>7.5</b> | <b>6.5</b> | <b>7.2</b>  | <b>7.9</b>  |            |
| 2004 | ABCT membrane-spanning permease                                  |              | <b>7</b> | ←          | <b>7.0</b> | <b>6.3</b> | <b>3.1</b>  | <b>3.4</b>  | <b>2.1</b> |
| 2005 | Conserved hypothetical                                           |              | <b>7</b> | ←          | <b>7.7</b> | <b>6.7</b> | <b>6.8</b>  | <b>6.7</b>  | <b>2.5</b> |
| 2006 | Choline binding protein D                                        | <i>cbpD</i>  | <b>7</b> | ←          | <b>2.5</b> | <b>2.3</b> | <b>11.6</b> | <b>11.8</b> |            |
| 2007 | Conserved hypothetical                                           |              | <b>7</b> | ←          | <b>2.3</b> | <b>2.9</b> |             |             |            |
| 2008 | Replicative DNA helicase                                         | <i>dnaC</i>  | <b>7</b> | ←          | <b>2.0</b> | <b>2.7</b> |             |             |            |
| 2009 | 50S Ribosomal protein subunit L9                                 | <i>rplI</i>  | <b>7</b> | ←          | <b>1.9</b> | <b>2.4</b> |             |             |            |
| 2010 | Conserved hypothetical                                           |              | <b>7</b> | ←          |            | <b>2.2</b> |             |             |            |
| 2012 | Involved in competence                                           | <i>comFC</i> | <b>7</b> | ←          |            |            | <b>11.9</b> | <b>11.3</b> |            |
| 2013 | Involved in competence                                           | <i>comFA</i> | <b>7</b> | ←          |            |            | <b>8.1</b>  | <b>6.9</b>  |            |
| 2018 | Degenerate transposase                                           |              |          |            | <b>2.9</b> |            | <b>2.1</b>  | <b>2.1</b>  |            |
| 2021 | General stress protein GSP-781                                   |              |          |            |            | -2.0       |             |             |            |
| 2022 | Cell-shape determining protein MreD                              | <i>mreD</i>  |          |            | <b>2.5</b> | <b>2.2</b> |             |             |            |

|      |                                          |             |   |   |      |      |      |
|------|------------------------------------------|-------------|---|---|------|------|------|
| 2023 | Cell shape determining protein MreC      | <i>mreC</i> |   |   | 1.8  |      |      |
| 2025 | ABCT ATP-binding-unknown substrate       |             |   |   | 2.0  | 1.9  |      |
| 2027 | P-glycero-P synthase                     | <i>pgsA</i> |   |   | 2.0  | 2.0  |      |
| 2028 | Conserved hypothetical                   |             |   |   | 1.9  |      |      |
| 2031 | Conserved hypothetical                   |             |   |   | 2.2  | 2.4  |      |
| 2032 | Recombination protein                    | <i>recF</i> |   |   | 2.6  | 2.6  |      |
| 2033 | Inosine-5-mono-P DH                      | <i>imdH</i> |   |   | -2.1 |      |      |
| 2036 | Conserved hypothetical                   |             |   |   |      | 2.1  |      |
| 2040 | Conserved hypothetical                   |             | 1 | → |      | 3.3  | 3.2  |
| 2041 | Response regulator                       | <i>comE</i> | 1 | ← | 2.1  | 23.5 | 23.0 |
| 2042 | Histidine protein kinase                 | <i>comD</i> | 1 | ← | 2.0  | 18.9 | 18.9 |
| 2043 | Competence stimulating peptide precursor | <i>comC</i> | 1 | ← |      | 6.0  | 6.0  |

<sup>a</sup>ABCT, ATP-binding cassette transporter; DH, dehydrogenase; P, phospho; PTS, phosphotransferase system.

<sup>b</sup>DEGs included were those showing significant fold variations detected either in microarrays ( $\geq 2$  and  $P < 0.05$ ) or by RNASeq ( $P < 1E-14$ ).

Table S2. Response of 35 *S. pneumoniae* R6 genes encoding DNA repair proteins

| Uniprot code<br>(_STRR6) | Description                                 | Gene        | R6<br>locus | SCN<br>RESPONSE | SCN<br>DOMAIN | Length (aa) |
|--------------------------|---------------------------------------------|-------------|-------------|-----------------|---------------|-------------|
| Q8DRQ1                   | Transcription-repair-coupling factor        | <i>mfd</i>  | spr0006     | UP              | UP            | 1,169       |
| Q8DRP0                   | DNA repair protein                          | <i>radA</i> | spr0025     | NR              | NR            | 420         |
| DPO1                     | DNA polymerase I                            | <i>polA</i> | spr0032     | DOWN            | NR            | 877         |
| RECO                     | DNA repair protein                          | <i>recO</i> | spr0036     | NR              | NR            | 256         |
| HEXB                     | DNA mismatch repair                         | <i>hexB</i> | spr0160     | NR              | NR            | 649         |
| RUVA                     | Holliday junction DNA helicase              | <i>ruvA</i> | spr0165     | NR              | NR            | 197         |
| UVRA                     | UvrABC system protein A                     | <i>uvrA</i> | spr0171     | NR              | NR            | 943         |
| RUVB                     | Holliday junction DNA helicase              | <i>ruvB</i> | spr0238     | NR              | NR            | 332         |
| RECU                     | Holliday junction resolvase                 | <i>recU</i> | spr0330     | NR              | NR            | 198         |
| DPO4                     | DNA polymerase IV                           | <i>dinB</i> | spr0414     | NR              | NR            | 353         |
| Q8CZ40                   | Uncharacterized protein                     |             | spr0488     | NR              | NR            | 131         |
| Q8DQR4                   | Single-stranded DNA-specific<br>exonuclease | <i>recJ</i> | spr0537     | DOWN            | NR            | 744         |
| UVRC                     | UvrABC system protein C                     | <i>uvrC</i> | spr0543     | NR              | NR            | 614         |
| Q8DQ41                   | Competence protein                          | <i>celA</i> | spr0856     | UP              | NR            | 216         |
| FPG                      | Formamidopyrimidine-DNA<br>glycosylase      | <i>mutM</i> | spr0872     | DOWN            | NR            | 274         |
| DNLJ                     | DNA ligase                                  | <i>ligA</i> | spr1024     | NR              | NR            | 652         |
| ADDB                     | ATP-dependent helicase                      | <i>rexB</i> | spr1039     | NR              | NR            | 1,091       |
| ADDA                     | ATP-dependent helicase                      | <i>addA</i> | spr1040     | NR              | NR            | 1,216       |
| MUTX                     | 8-oxo-dGTP diphosphatase                    | <i>mutX</i> | spr1054     | NR              | NR            | 154         |
| UNG                      | Uracil-DNA glycosylase                      | <i>ung</i>  | spr1055     | NR              | NR            | 217         |
| Q8DPN3                   | DNA repair protein                          | <i>recN</i> | spr1084     | NR              | NR            | 555         |
| UVRB                     | UvrABC system protein B                     | <i>uvrB</i> | spr1118     | NR              | NR            | 662         |
| Q8DPH8                   | Endonuclease III                            | <i>nth</i>  | spr1157     | NR              | NR            | 209         |
| Q8DP74                   | O6-methylguanine-DNA<br>methyltransferase   | <i>ogt</i>  | spr1317     | DOWN            | DOWN          | 176         |
| SSB                      | Single-stranded DNA-binding                 | <i>ssb</i>  | spr1395     | NR              | NR            | 156         |
| RECR                     | Recombination protein                       | <i>recR</i> | spr1516     | NR              | NR            | 198         |
| Q7ZAK6                   | Branch migration of Holliday<br>junction    | <i>recG</i> | spr1539     | UP              | NR            | 671         |
| EXOA                     | Exodeoxyribonuclease                        | <i>exoA</i> | spr1660     | NR              | NR            | 275         |
| RECX                     | Regulatory protein                          | <i>recX</i> | spr1718     | NR              | NR            | 258         |
| Q8DNH4                   | Single-stranded DNA-binding                 | <i>ssbB</i> | spr1724     | NR              | NR            | 131         |
| RECA                     | Protein RecA                                | <i>recA</i> | spr1757     | UP              | UP            | 388         |
| HEXA                     | DNA mismatch repair protein HexA            | <i>hexA</i> | spr1888     | UP              | UP            | 844         |
| MALX                     | Maltose/maltodextrin-binding<br>protein     | <i>malX</i> | spr1918     | NR              | NR            | 423         |
| RECF                     | DNA replication and repair protein          | <i>recF</i> | spr2032     | NR              | NR            | 365         |



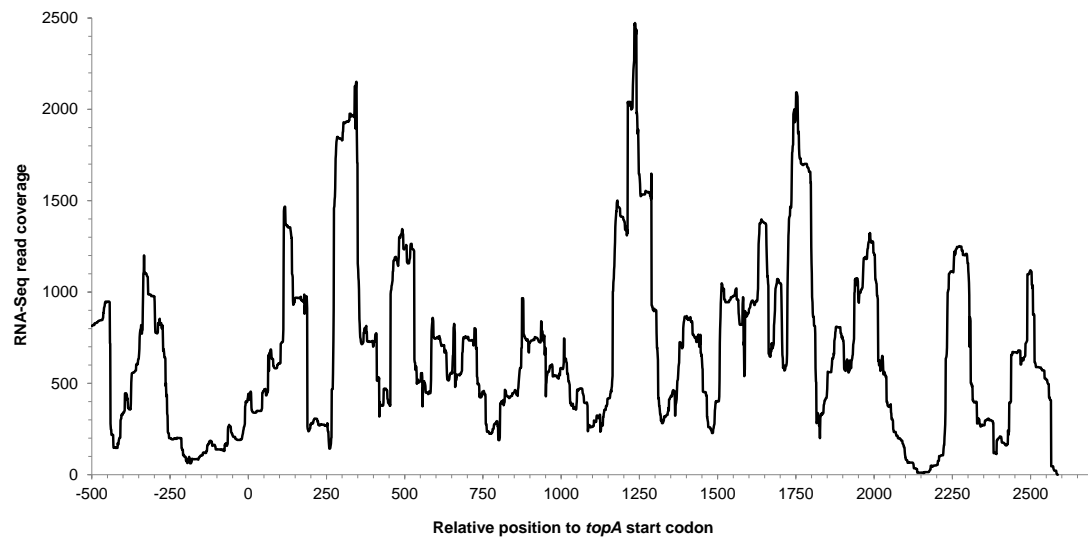

**Figure S1. Determination of the start transcription site of *topA* by RNA-Seq.** Thirty million reads from the RNA-Seq experiment of R6 strain grown in AGCH containing 0.2% yeast extract and 0.3% sucrose yeast extract to OD<sub>620nm</sub> of 0.4 (see Methods) were considered. The total of 27,809 reads (roughly 0.1% of reads; in the range of the genome average) fully mapped within the genome section covering from -500 to +500 the *topA* ORF. The lowest read counts (<90 reads were found in the intergenic regions (~-200 and ~+2150 nt) just besides the predicted transcriptional terminators of *topA* and the preceding ORF. However, there were also prominent valleys inside the coding sequence (e.g. 143 reads, nt +260). The number of reads upstream *topA* increases just after its well-defined -35 and -10 promoter boxes, in particular from the -24 nucleotide (>190 reads). This nucleotide correspond to an “A” nucleotide, normally involved as transcription starts, surrounded by three (upstream) and two (downstream) less-probable “T” nucleotides. Therefore we propose the -24 position as the most probable start transcription site of *topA* in *S. pneumoniae* R6.
